# Supplementary material for: Synthesis and crystal growth mechanism of ZSM-22 zeolite nanosheets
Source: Royal Society of Chemistry journal article supplement (doi:10.1039/c6ce00773b), 2016-01-01
Supplement: c6ce00773b1.pdf [file c6ce00773b1.pdf]

## Electronic Supplementary Information

### Synthesis and crystal growth mechanism of nanosheet ZSM-22 zeolite

Yi Luo,<sup>a,b</sup> Zhendong Wang,<sup>b\*</sup> Shaoqin Jin,<sup>b</sup> Bin Zhang,<sup>b</sup> Hongmin Sun,<sup>b</sup> Xiaohong Yuan,<sup>b</sup> and Weimin Yang<sup>a,b\*</sup>

<sup>a</sup> School of Chemical Engineering, East China University of Science and Technology, Shanghai, 200237, P. R. China.

<sup>b</sup> Shanghai Research Institute of Petrochemical Technology, State Key Laboratory of Green Chemical Engineering and Industrial Catalysis, Shanghai, 201208, P. R. China.

\*Corresponding author E-mail address: yangwm.sshy@sinopec.com (Weimin Yang)  
wangzd.sshy@sinopec.com (Zhendong Wang)

Tel : +86-21-6846-2197

Fax: +86-21-6846-2283

#### 1. Experimental section

ZSM-22 zeolites with different SiO<sub>2</sub>/Al<sub>2</sub>O<sub>3</sub> molar ratios were hydrothermally synthesized using Ludox (40wt % SiO<sub>2</sub> in water), NaOH (96wt %), NaAlO<sub>2</sub> (35wt % Na<sub>2</sub>O, 43wt % Al<sub>2</sub>O<sub>3</sub>), 1-ethylpyridinium bromide (99wt %, SDA) and distilled water as source materials. The molar composition of the gel is 1 SiO<sub>2</sub> : 1/x Al<sub>2</sub>O<sub>3</sub> : 0.075 Na<sub>2</sub>O : 0.25 R : 18 H<sub>2</sub>O, where x=100, 200, 300, and 400, respectively. The starting gels with identical compositions were transformed into stainless steel autoclaves (50 mL), and crystallized dynamically (20 rpm) at 423K for 3 days. After crystallization, the autoclaves were cooled and the solid products were separated by filtration, washed and dried. The organic template was removed by calcination at 550 °C for 5 h in air. Needle-like ZSM-22 zeolite was synthesized according to reference 18.

#### 2. Characterization

X-ray powder diffraction (XRD) patterns were recorded on a D8 Advance SS X-ray diffractometer using CuK $\alpha$  radiation at 40 kV and 40 mA. The data was collected from 2° to 50° with a sampling interval of 0.020° at a scanning rate of 5°/min. The crystallinity of the product was calculated by comparison of the integrated area of selected peaks (five main peaks assigned to the (110), (021), (131), (330), and (400) reflections) with that of physical mixtures of the amorphous phase withdrawn at the beginning of the synthesis and well-crystallized ZSM-22 zeolite product. Scanning electron microscopy (SEM) images were taken on a field emission XL30E scanning electron microscopy (FEI Company). Transmission electron microscopy (TEM) images were performed using Tecnai G<sup>2</sup> 20 S-TWIN electron microscopy (FEI Company). Surface areas and pore volumes were obtained from N<sub>2</sub> adsorption/desorption isotherms using multipoint BET and t-plot methods. Prior to analysis, each sample was degassed under vacuum at 350 °C for 10 h. The experiments were performed on a

Micromeretic ASAP2020M physisorption apparatus at liquid nitrogen temperature of -196 °C. The SiO<sub>2</sub>/Al<sub>2</sub>O<sub>3</sub> molar ratios of all samples were quantified by inductively coupled plasma (ICP) on a Varian 725-ES instrument. The X-ray photoelectron spectroscopy (XPS) analyses were performed on a Kratos Axis Ultra DLD spectrometer (Kratos Analytical, UK) equipped with a non-monochromatised magnesium X-ray source.

Table S1 N<sub>2</sub> adsorption characterization results of nanosheet and needle-like ZSM-22 zeolites.

| Samples <sup>a</sup> | S <sub>BET</sub> (m <sup>2</sup> /g) <sup>b</sup> | S <sub>micro</sub> (m <sup>2</sup> /g) <sup>c</sup> | S <sub>ext</sub> (m <sup>2</sup> /g) <sup>c</sup> | V <sub>micro</sub> (cm <sup>3</sup> /g) <sup>c</sup> |
|----------------------|---------------------------------------------------|-----------------------------------------------------|---------------------------------------------------|------------------------------------------------------|
| Nanosheet-48h        | 52                                                | 5                                                   | 47                                                | 0.002                                                |
| Nanosheet-54h        | 38                                                | 10                                                  | 28                                                | 0.004                                                |
| Nanosheet-60h        | 78                                                | 29                                                  | 49                                                | 0.013                                                |
| Nanosheet-66h        | 243                                               | 196                                                 | 47                                                | 0.091                                                |
| Nanosheet-72h        | 247                                               | 188                                                 | 59                                                | 0.087                                                |
| Needle-like          | 196                                               | 164                                                 | 32                                                | 0.076                                                |

<sup>a</sup> synthesized with different crystallization time, <sup>b</sup> BET method, <sup>c</sup> *t*-plot method

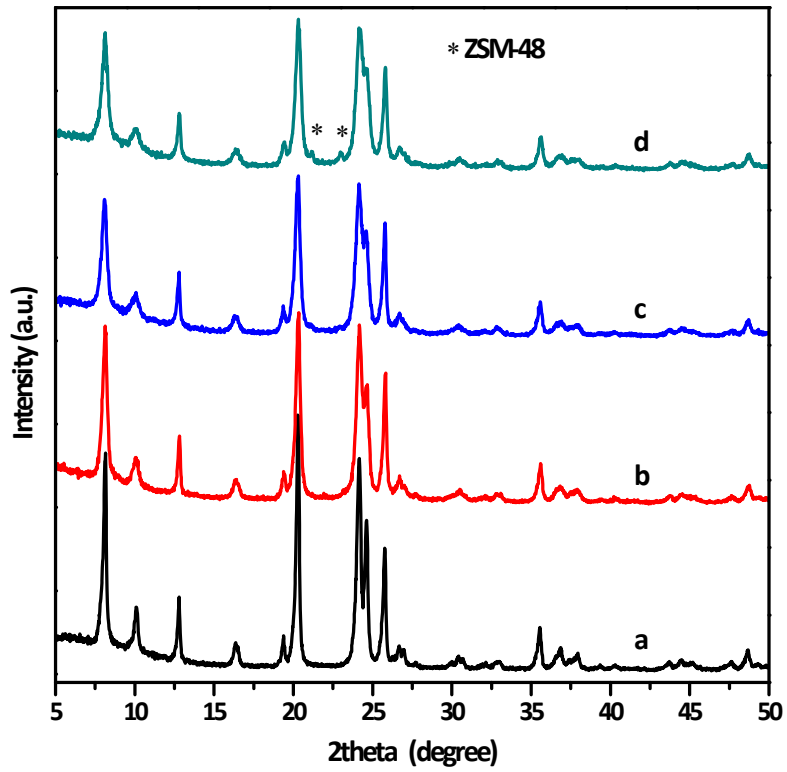

Fig. S1 XRD patterns of ZSM-22 zeolite synthesized with different SiO<sub>2</sub>/Al<sub>2</sub>O<sub>3</sub> ratios of a) 100, b) 200, c) 300 and d) 400.

Table S2 Texture properties of ZSM-22 zeolites synthesized with different SiO<sub>2</sub>/Al<sub>2</sub>O<sub>3</sub> molar ratios

| Sample <sup>a</sup> | SiO <sub>2</sub> /Al <sub>2</sub> O <sub>3</sub> |              | S <sub>BET</sub> <sup>b</sup><br>(m <sup>2</sup> /g) | S <sub>micro</sub> <sup>c</sup><br>(m <sup>2</sup> /g) | S <sub>ext</sub> <sup>c</sup><br>(m <sup>2</sup> /g) | V <sub>micro</sub> <sup>c</sup><br>(cm <sup>3</sup> /g) | Average thickness<br>(T nm) <sup>d</sup> |
|---------------------|--------------------------------------------------|--------------|------------------------------------------------------|--------------------------------------------------------|------------------------------------------------------|---------------------------------------------------------|------------------------------------------|
|                     | Gel                                              | ICP analysis |                                                      |                                                        |                                                      |                                                         |                                          |
| 1                   | 100                                              | 104          | 206                                                  | 188                                                    | 18                                                   | 0.087                                                   | 50                                       |
| 2                   | 200                                              | 198          | 247                                                  | 188                                                    | 59                                                   | 0.087                                                   | 12                                       |
| 3                   | 300                                              | 317          | 251                                                  | 190                                                    | 61                                                   | 0.089                                                   | 10                                       |
| 4                   | 400                                              | 414          | 252                                                  | 186                                                    | 66                                                   | 0.086                                                   | 8                                        |

<sup>a</sup> Synthesized through hydrothermal crystallization under rotation (20 rpm) at 423 K for 3 days, with starting molar composition of 1 SiO<sub>2</sub> : 1/x Al<sub>2</sub>O<sub>3</sub> : 0.075 Na<sub>2</sub>O : 0.25 R : 18 H<sub>2</sub>O, where x=100, 200, 300, and 400, respectively.

<sup>b</sup> BET method, <sup>c</sup> *t*-plot method, <sup>d</sup> determined by SEM and TEM.
